# Supplementary material for: Vocal complexity in the long calls of Bornean orangutans
Source: bioRxiv preprint, doi:10.1101/2023.04.05.535487, version 2 (2024-04-09)

**Figure S2.** Boxplots of features that differed across human-labeled pulses (upper left), affinity propagation clusters (upper right), and typical calls in fuzzy clusters (lower left) for each of the following influential features: a) center frequency, b) peak frequency, c) mean peak frequency, d) third quartile frequency, e) first quartile frequency.


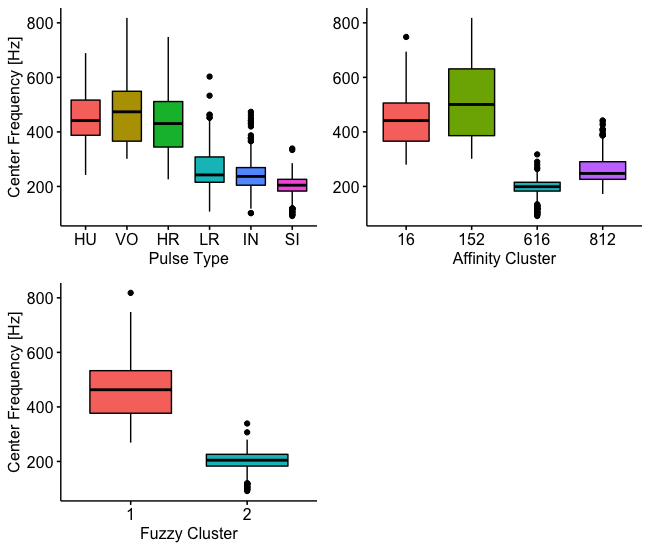


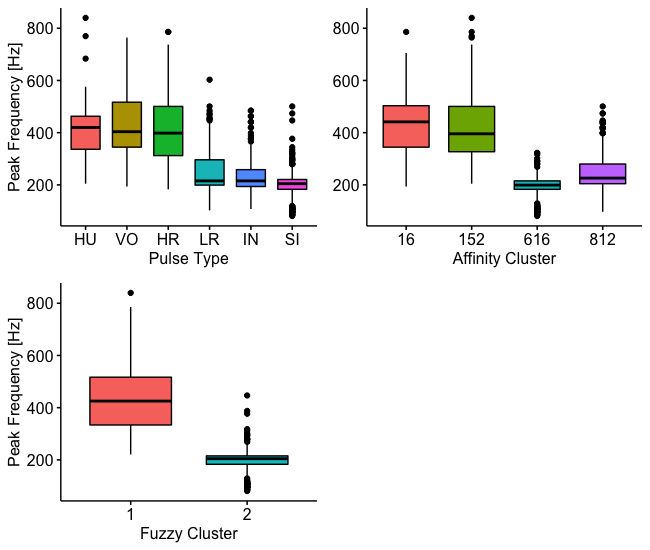


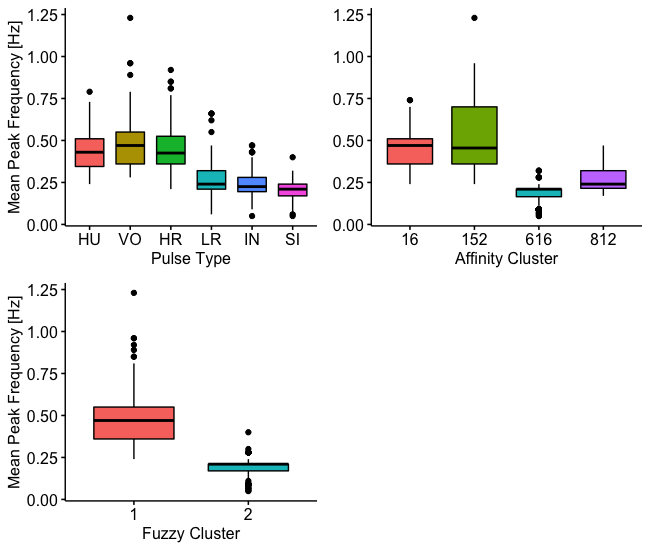


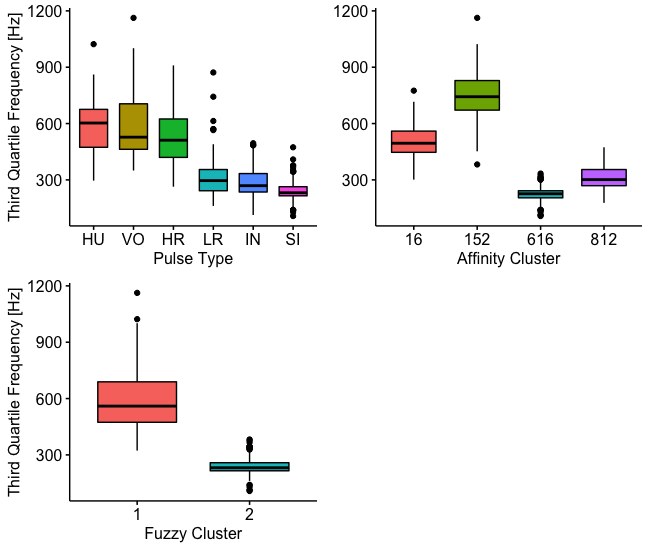


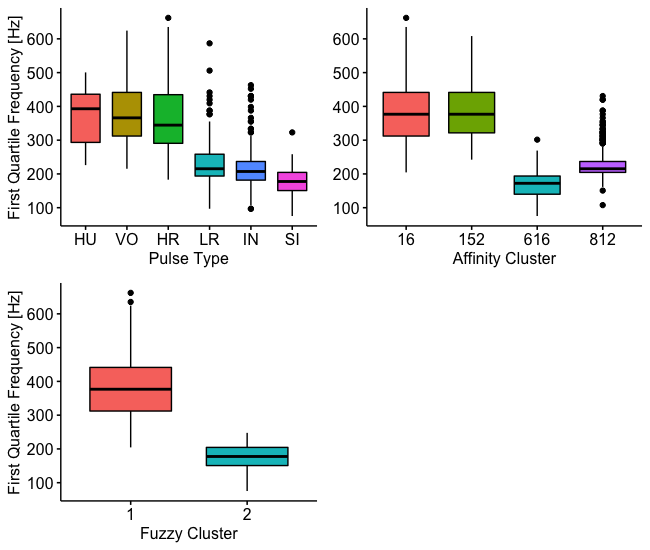

Supplement: Supplemental Figure 2 [file 535487_file07.docx]
