# Supplementary material for: Vocal complexity in the long calls of Bornean orangutans
Source: bioRxiv preprint, doi:10.1101/2023.04.05.535487, version 2 (2024-04-09)

**Figure S4.** Histograms showing bootstrapping results across 25 iterations within 2–40 randomly sampled features showing: a) distribution of the number of clusters identified by affinity propagation and b) distribution of the number of clusters identified by fuzzy clustering.


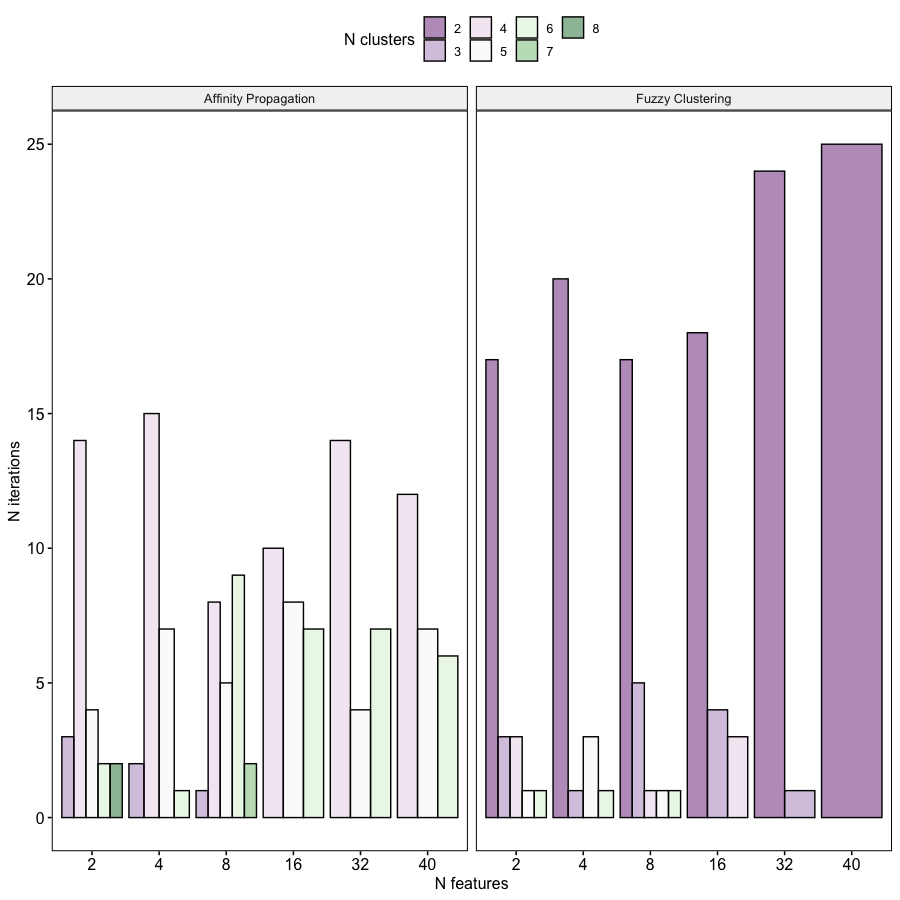

Supplement: Supplemental Figure 4 [file 535487_file09.docx]
